# Supplementary material
Source: PubMed Central journal article supplement (PMC2652357)
Supplement: mp700106w-File002.pdf [file mp700106w-File002.pdf]

## SUPPLEMENTARY INFORMATION

**Table S1:** Fraction of live NIH 3T3 cells after incubation with the different C<sub>60</sub> vectors as a function of derivatized fullerene concentration after 2 hour C<sub>60</sub>-incubation times in serum-free medium. (mean ± standard deviation for n = 4).

| C <sub>60</sub><br>Vector | Fraction of live cells (%) at various concentrations (µg/ µl) |             |             |             |             |
|---------------------------|---------------------------------------------------------------|-------------|-------------|-------------|-------------|
|                           | 0.1 ug/ml                                                     | 1 ug/ml     | 2 ug/ml     | 4 ug/ml     | 10 ug/ml    |
| <b>IV</b>                 | 1.08 ± 0.13                                                   | 1.09 ± 0.13 | 1.03 ± 0.12 | 0.99 ± 0.10 | 0.80 ± 0.05 |
| <b>III</b>                | 1.03 ± 0.23                                                   | 1.04 ± 0.13 | 1.04 ± 0.10 | 1.07 ± 0.13 | 0.70 ± 0.11 |
| <b>II</b>                 | 0.90 ± 0.09                                                   | 0.69 ± 0.03 | 1.11 ± 0.06 | 1.06 ± 0.12 | 1.03 ± 0.09 |
| <b>I</b>                  | 0.63 ± 0.09                                                   | 0.69 ± 0.03 | 0.72 ± 0.11 | 0.63 ± 0.04 | 0.55 ± 0.08 |
| <b>V</b>                  | 0.98 ± 0.10                                                   | 1.16 ± 0.06 | 0.91 ± 0.15 | 0.79 ± 0.12 | 0.72 ± 0.09 |
| <b>VI</b>                 | 0.95 ± 0.06                                                   | 0.92 ± 0.13 | 0.85 ± 0.11 | 0.70 ± 0.09 | 0.75 ± 0.08 |

**Table S2:** Fraction of live NIH 3T3 cells after incubation with the different C<sub>60</sub> vectors as a function of derivatized fullerene concentration after 8 hour C<sub>60</sub>-incubation times in serum-free medium. (mean ± standard deviation for n = 4).

| C <sub>60</sub><br>Vector | Fraction of live cells (%) at various concentrations (µg/ µl) |             |             |             |             |
|---------------------------|---------------------------------------------------------------|-------------|-------------|-------------|-------------|
|                           | 0.1 ug/ml                                                     | 1 ug/ml     | 2 ug/ml     | 4 ug/ml     | 10 ug/ml    |
| <b>IV</b>                 | 0.96 ± 0.04                                                   | 0.98 ± 0.03 | 0.92 ± 0.05 | 0.97 ± 0.04 | 0.89 ± 0.10 |
| <b>III</b>                | 0.96 ± 0.05                                                   | 0.98 ± 0.03 | 0.97 ± 0.05 | 1.02 ± 0.02 | 0.86 ± 0.11 |
| <b>II</b>                 | 0.82 ± 0.03                                                   | 0.88 ± 0.14 | 0.68 ± 0.04 | 0.72 ± 0.01 | 0.77 ± 0.18 |
| <b>I</b>                  | 0.52 ± 0.13                                                   | 0.56 ± 0.03 | 0.59 ± 0.08 | 0.70 ± 0.14 | 0.51 ± 0.04 |
| <b>V</b>                  | 1.04 ± 0.04                                                   | 0.97 ± 0.07 | 0.95 ± 0.13 | 0.84 ± 0.08 | 0.69 ± 0.12 |
| <b>VI</b>                 | 1.01 ± 0.1                                                    | 0.95 ± 0.10 | 0.81 ± 0.15 | 0.69 ± 0.06 | 0.65 ± 0.08 |

**Table S3:** Fraction of live NIH 3T3 cells after incubation with the different C<sub>60</sub> vectors as a function of derivatized fullerene concentration after 24 hour C<sub>60</sub>-incubation times in serum-free medium (mean ± standard deviation for n = 4).

| C <sub>60</sub> Vector | Fraction of live cells (%) at various concentrations (µg/ µl) |             |             |             |             |
|------------------------|---------------------------------------------------------------|-------------|-------------|-------------|-------------|
|                        | 0.1 ug/ml                                                     | 1 ug/ml     | 2 ug/ml     | 4 ug/ml     | 10 ug/ml    |
| <b>IV</b>              | 0.98 ± 0.07                                                   | 0.90 ± 0.16 | 0.92 ± 0.07 | 0.84 ± 0.12 | 0.68 ± 0.15 |
| <b>III</b>             | 0.84 ± 0.13                                                   | 0.93 ± 0.11 | 0.71 ± 0.16 | 0.65 ± 0.13 | 0.57 ± 0.09 |
| <b>II</b>              | 0.79 ± 0.07                                                   | 0.91 ± 0.11 | 0.69 ± 0.08 | 0.43 ± 0.12 | 0.34 ± 0.13 |
| <b>I</b>               | 0.60 ± 0.11                                                   | 0.62 ± 0.10 | 0.54 ± 0.11 | 0.40 ± 0.02 | 0.21 ± 0.05 |
| <b>V</b>               | 0.85 ± 0.14                                                   | 0.94 ± 0.07 | 0.77 ± 0.11 | 0.57 ± 0.09 | 0.49 ± 0.10 |
| <b>VI</b>              | 0.93 ± 0.07                                                   | 0.86 ± 0.03 | 0.67 ± 0.13 | 0.58 ± 0.09 | 0.40 ± 0.07 |

**Table S4:** Fraction of live NIH 3T3 cells after incubation with the different C<sub>60</sub>/DNA transfection mixtures as a function of C<sub>60</sub> compound concentration and varying R value after 2 hour post-transfection incubation time in serum-free medium (mean ± standard deviation for n = 4).

| C <sub>60</sub> Vector | Fraction of live cells (%) at various R Values |             |             |             |             |
|------------------------|------------------------------------------------|-------------|-------------|-------------|-------------|
|                        | R = 0.42                                       | R = 4.2     | R = 8.4     | R = 16.8    | R = 42      |
| <b>IV</b>              | 0.99 ± 0.07                                    | 0.93 ± 0.06 | 0.80 ± 0.12 | 0.79 ± 0.03 | 0.75 ± 0.05 |
| <b>III</b>             | 0.92 ± 0.03                                    | 0.96 ± 0.11 | 0.84 ± 0.12 | 0.87 ± 0.05 | 0.81 ± 0.10 |
| <b>II</b>              | 0.70 ± 0.15                                    | 0.59 ± 0.10 | 0.54 ± 0.09 | 0.27 ± 0.07 | 0.19 ± 0.06 |
| <b>I</b>               | 0.59 ± 0.04                                    | 0.61 ± 0.06 | 0.42 ± 0.14 | 0.30 ± 0.09 | 0.25 ± 0.12 |
| <b>V</b>               | 0.96 ± 0.11                                    | 1.07 ± 0.07 | 0.93 ± 0.13 | 0.81 ± 0.11 | 0.74 ± 0.08 |
| <b>VI</b>              | 0.95 ± 0.08                                    | 0.91 ± 0.12 | 0.82 ± 0.10 | 0.74 ± 0.10 | 0.77 ± 0.07 |

**Table S5:** Fraction of live NIH 3T3 cells after incubation with the different C<sub>60</sub>/DNA transfection mixtures as a function of C<sub>60</sub> compound concentration and varying R value after 8 hour post-transfection incubation time in serum-free medium (mean ± standard deviation for n = 4).

| <b>C<sub>60</sub><br/>Vector</b> | <b>Fraction of live cells (%) at various R Values</b> |                |                |                 |               |
|----------------------------------|-------------------------------------------------------|----------------|----------------|-----------------|---------------|
|                                  | <b>R = 0.42</b>                                       | <b>R = 4.2</b> | <b>R = 8.4</b> | <b>R = 16.8</b> | <b>R = 42</b> |
| <b>IV</b>                        | 0.92 ± 0.04                                           | 0.82 ± 0.03    | 0.69 ± 0.05    | 0.63 ± 0.04     | 0.59 ± 0.07   |
| <b>III</b>                       | 0.76 ± 0.08                                           | 0.78 ± 0.03    | 0.67 ± 0.05    | 0.62 ± 0.02     | 0.56 ± 0.04   |
| <b>II</b>                        | 0.55 ± 0.06                                           | 0.48 ± 0.04    | 0.23 ± 0.09    | 0.21 ± 0.08     | 0.16 ± 0.08   |
| <b>I</b>                         | 0.42 ± 0.11                                           | 0.51 ± 0.05    | 0.29 ± 0.09    | 0.20 ± 0.04     | 0.22 ± 0.08   |
| <b>V</b>                         | 0.96 ± 0.03                                           | 0.91 ± 0.06    | 0.95 ± 0.08    | 0.70 ± 0.05     | 0.71 ± 0.05   |
| <b>VI</b>                        | 0.98 ± 0.07                                           | 0.93 ± 0.06    | 0.75 ± 0.03    | 0.74 ± 0.07     | 0.4 ± 0.04    |

**Table S6:** Fraction of live NIH 3T3 cells after incubation with the different C<sub>60</sub>/DNA transfection mixtures as a function of C<sub>60</sub> compound concentration and varying R value after 24 hour post-transfection incubation time in serum-free medium (mean ± standard deviation for n = 4).

| <b>C<sub>60</sub><br/>Vector</b> | <b>Fraction of live cells (%) at various R Values</b> |                |                |                 |               |
|----------------------------------|-------------------------------------------------------|----------------|----------------|-----------------|---------------|
|                                  | <b>R = 0.42</b>                                       | <b>R = 4.2</b> | <b>R = 8.4</b> | <b>R = 16.8</b> | <b>R = 42</b> |
| <b>IV</b>                        | 0.78 ± 0.05                                           | 0.70 ± 0.04    | 0.52 ± 0.09    | 0.34 ± 0.05     | 0.11 ± 0.05   |
| <b>III</b>                       | 0.74 ± 0.04                                           | 0.71 ± 0.08    | 0.46 ± 0.06    | 0.29 ± 0.08     | 0.17 ± 0.05   |
| <b>II</b>                        | 0.29 ± 0.04                                           | 0.21 ± 0.09    | 0.23 ± 0.07    | 0.10 ± 0.06     | 0.11 ± 0.07   |
| <b>I</b>                         | 0.34 ± 0.04                                           | 0.22 ± 0.04    | 0.14 ± 0.07    | 0.11 ± 0.05     | 0.13 ± 0.08   |
| <b>V</b>                         | 0.80 ± 0.10                                           | 0.74 ± 0.06    | 0.68 ± 0.05    | 0.67 ± 0.06     | 0.59 ± 0.07   |
| <b>VI</b>                        | 0.81 ± 0.04                                           | 0.75 ± 0.08    | 0.57 ± 0.10    | 0.48 ± 0.08     | 0.2 ± 0.06    |
